# Supplementary material for: High performance Si nanowire field-effect-transistors based on a CMOS inverter with tunable threshold voltage
Source: Royal Society of Chemistry journal article supplement (doi:10.1039/c3nr06690h), 2014-01-01
Supplement: c3nr06690h1.pdf [file c3nr06690h1.pdf]

## Supporting Information

### **High Performance Si Nanowire Field-Effect-Transistors Based on a CMOS Inverter with Tunable Threshold Voltage**

By Ngoc Huynh Van, Jae-Hyun Lee<sup>1</sup>, Jung Inn Sohn<sup>2</sup>, Seung Nam Cha<sup>2</sup>, Dongmok Whang<sup>1</sup>, Jong Min Kim<sup>2</sup>, and Dae Joon Kang\*

[\*] Prof. Dae Joon Kang, Ngoc Huynh Van  
BK21 Physics Research Division, Department of Energy Science, Institute of Basic Science, SKKU Advanced Institute of Nanotechnology, Sungkyunkwan University, Jangan-gu, Suwon 440-746, Republic of Korea.  
E-Mail: dj kang@skku.edu

Jae-Hyun Lee, Prof. Dongmok Whang  
<sup>1</sup>School of Advanced Materials Science and Engineering, SKKU Advanced Institute of Nanotechnology, Sungkyunkwan University, Suwon 440-746, Republic of Korea.

Dr. Jung Inn Sohn, Dr. Seung Nam Cha, Prof. Jong Min Kim  
<sup>2</sup>Department of Engineering Science, University of Oxford, Oxfordshire OX1 3PJ, United Kingdom

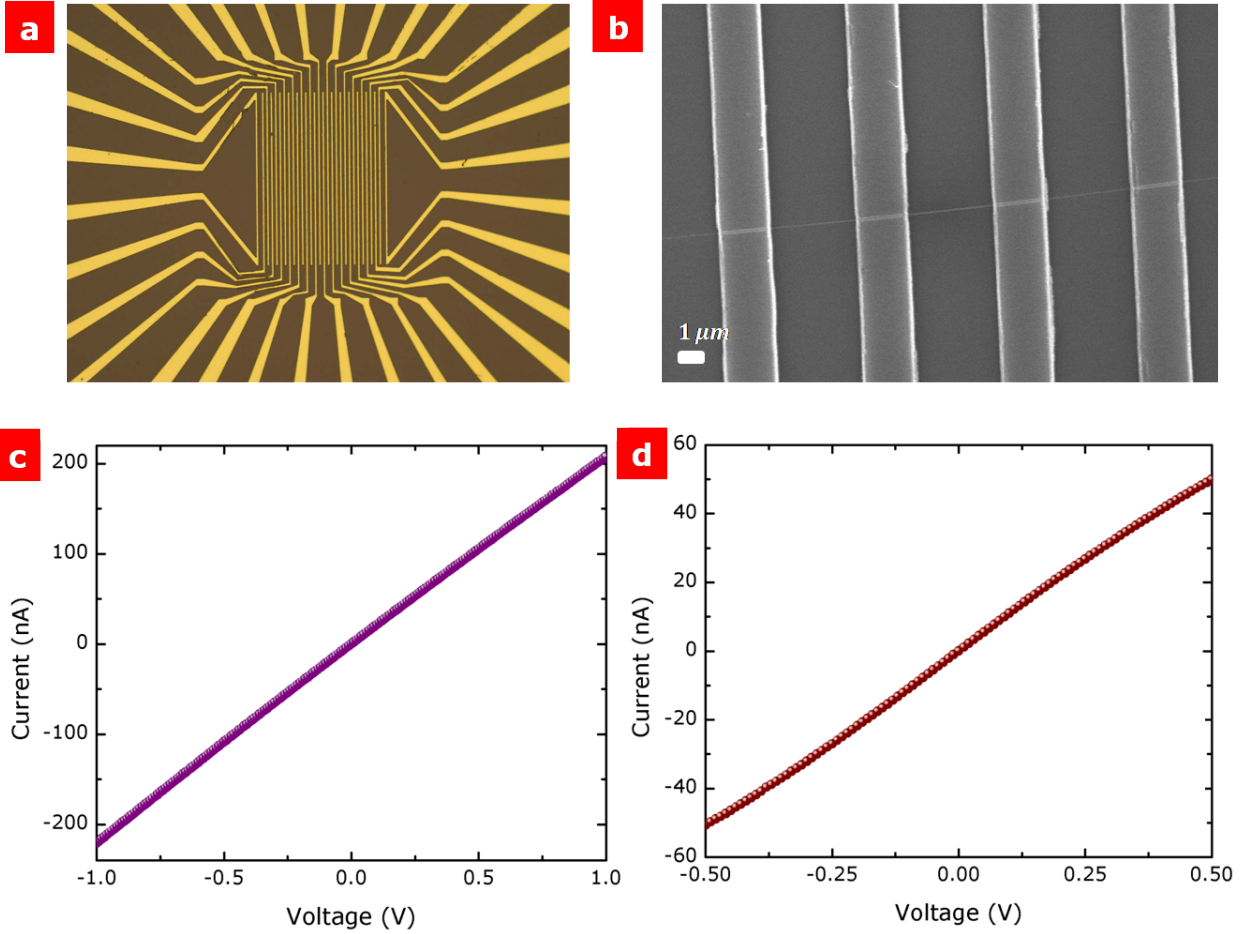

**Fig. S1.** (a) Optical and (b) FE-SEM images of Si NWFET devices; four probe measurements of n-type (c) and p-type (d) Si NWs; The n-type Si NW resistance ( $R$ ) of  $4.63 \times 10^6 \Omega$  was extrapolated from the linear region of the current-voltage curve of four probe measurements. The resistivity  $\rho = 0.22 \Omega\text{cm}$  was calculated according to  $\rho = RA/L$ , where  $A = \pi r^2$  is the Si NW cross section,  $L$  is the conducting channel length of the nanowire ( $\sim 5 \mu\text{m}$ ), and  $r$  is the radius of the nanowire ( $\sim 27.5 \text{ nm}$ ). The resistance,  $R = 10^7 \Omega$ , and resistivity,  $\rho = 0.48 \Omega\text{cm}$ , were calculated for p-type Si NWs from Fig. S1.d.

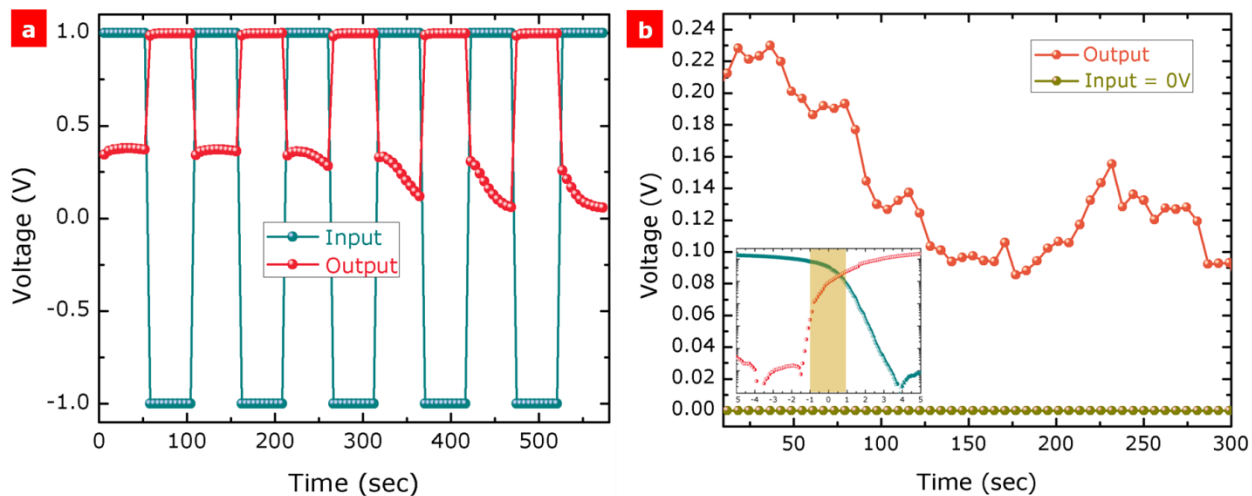

**Fig. S2.** (a) The dynamic response of the inverter to square wave input pulses of  $\pm 1$  V and (b) Output voltage at an input gate voltage of 0 V with  $V_{dd}$  set at 1 V

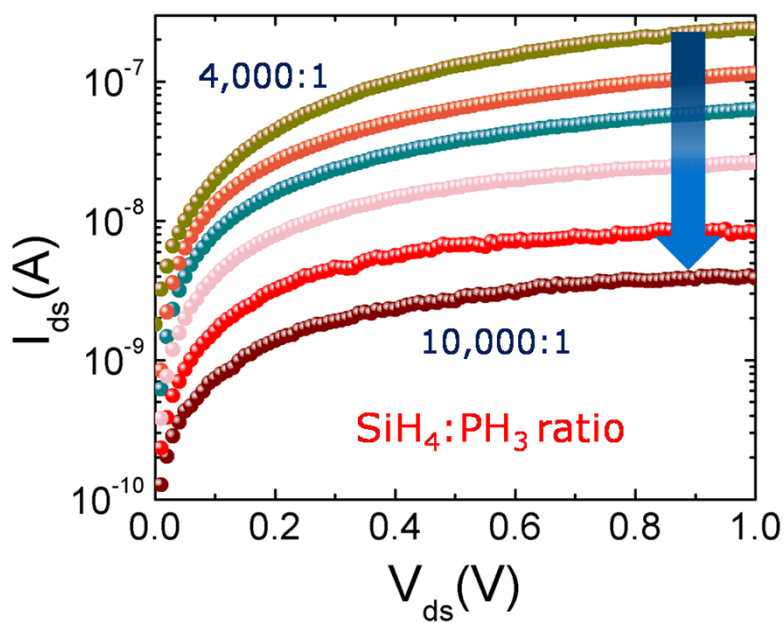

**Fig. S3.** The output characteristics ( $I_{ds}$ - $V_{ds}$ ) of n-type Si NWFETs at different doping concentrations of Silane ( $\text{SiH}_4$ )/ Phosphine ( $\text{PH}_3$ ) gas ratios of 4,000:1 to 10,000:1. Gate voltage of 5 V.

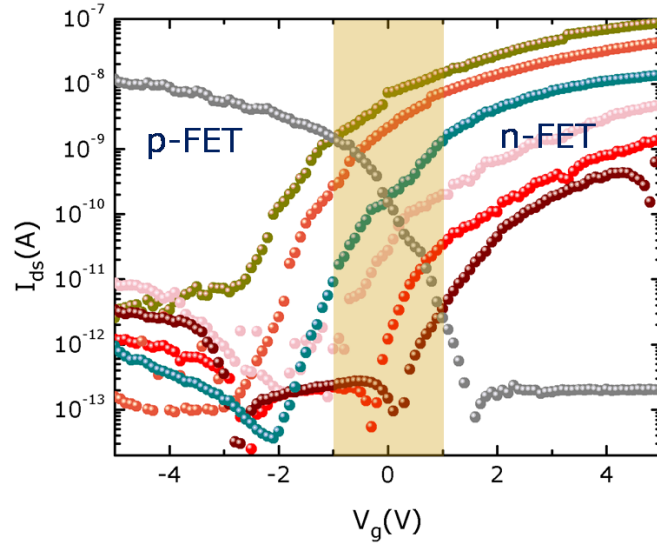

**Fig. S4.** (a)  $I_{ds}$ - $V_g$  transfer characteristics of n-type Si NWFETs at different doping concentrations of Silane ( $\text{SiH}_4$ )/ Phosphine ( $\text{PH}_3$ ) gas ratios of 4,000:1 to 10,000:1 and p-type Si NWFET at doping concentration of Silane ( $\text{SiH}_4$ )/Diborane ( $\text{B}_2\text{H}_6$ ) gas ratio of 5,000:1
